1 A study of the structural properties of sites  
2 modified by the *O*-linked 6-N-  
3 acetylglucosamine transferase  
4

5  
6 **Short title:** Structural characterisation of *O*-GlcNAc sites

7 **keywords:** post-translational modification, computational biology, structural analysis, *O*-  
8 GlcNAc, protein disorder  
9

10 Thiago Britto-Borges and Geoffrey J. Barton\*

11  
12 Division of Computational Biology  
13 School of Life Sciences  
14 University of Dundee  
15 Dow Street, Dundee, DD1 5EH  
16 UK`  
17

18  
19  
20 \*To whom correspondence should be addressed: [g.j.barton@dundee.ac.uk](mailto:g.j.barton@dundee.ac.uk)  
21  
22

23

## 24 **Abstract**

25 Protein O-GlcNAcylation (O-GlcNAc) is an essential post-translational modification (PTM) in  
26 higher eukaryotes. The O-linked  $\beta$ -N-acetylglucosamine transferase (OGT), targets specific  
27 Serines and Threonines (S/T) in intracellular proteins. However, unlike phosphorylation, fewer  
28 than 25% of known O-GlcNAc sites match a clear sequence pattern. Accordingly, the three-  
29 dimensional structures of O-GlcNAc sites were characterised to investigate the role of structure  
30 in molecular recognition. Of the 143/1,584 O-GlcNAc sites in 620 proteins were mapped to  
31 protein X-ray structures. The modified S/T were 1.7x more likely to be annotated in the REM465  
32 field which defines missing residues in a protein structure, while 7 O-GlcNAc sites were solvent  
33 inaccessible and unlikely to be targeted by OGT. The 132/143 sites with complete backbone  
34 atoms clustered into 10 groups, but these were indistinguishable from clusters from unmodified  
35 S/T. This suggests there is no prevalent three-dimensional motif for OGT recognition. Predicted  
36 features from the 620 proteins were compared to unmodified S/T in O-GlcNAcylated proteins  
37 and globular proteins. The Jpred4 predicted secondary structure shows that modified S/T were  
38 more likely to be coils. 5/6 methods to predict intrinsic disorder indicated O-GlcNAcylated S/T  
39 to be significantly more disordered than unmodified S/T. Although the analysis did not find a  
40 pattern in the site three-dimensional structure, it revealed the residues around the modification  
41 site are likely to be disordered and suggests a potential role of secondary structure elements in  
42 OGT site recognition.

43

## 44 I. Introduction

45 Protein *O*-GlcNAcylation, or *O*-GlcNAc, is a dynamic, intracellular glycosylation essential to  
46 mammalian development<sup>1,2</sup>. In animals, two enzymes mediate this post-translational  
47 modification: the glycosyltransferase O-linked N-acetylglucosamine transferase (OGT), which  
48 adds a single, non-extensible *O*-GlcNAc moiety to serine/threonine (S/T) in the target protein;  
49 and the hexosaminidase *O*-GlcNAcase (OGA) that removes it. UDP-GlcNAc, the sugar donor to  
50 the protein *O*-GlcNAcylation, is a product of the hexosamine pathway, hence the concentration  
51 of intracellular glucose and the degree of protein *O*-GlcNAcylation levels are associated<sup>3, 4</sup>. At  
52 the physiological level, dysfunction of OGT activity has been linked to disease of the  
53 cardiovascular system, diabetes, impaired development, cancer and neurodegeneration<sup>5-9</sup>. At the  
54 cellular level, protein *O*-GlcNAcylation acts with phosphorylation, ubiquitylation and other  
55 reversible post-translational modifications in a network of cell signalling events that promote  
56 cellular adaptation to the viral infection process<sup>10</sup>, regulation of transcription<sup>11</sup> and metabolism<sup>12</sup>,  
57 <sup>13</sup>.

58 Technical advances in mass spectrometry have led to an increase in the number of  
59 experimentally determined *O*-GlcNAc sites from 50 in the year 2000 to more than 1,000 today<sup>14</sup>.  
60 However, there are still obstacles to mapping *O*-GlcNAc sites reliably. The modification has a  
61 low abundance<sup>15</sup> and is ten times less common than protein phosphorylation<sup>16</sup>. Thus, the  
62 unmodified version of the peptide can suppress the *O*-GlcNAcylated peptide mass/charge signal.  
63 In addition, methods to enrich *O*-GlcNAcylated peptides in samples have limited specificity<sup>16, 17</sup>,  
64 and the  $\beta$ -glycosidic bond is labile under the peptide fragmentation step which determines the  
65 modification's position within the peptide fragment.

66 Two machine learning methods have been used to detect patterns in the sequence of *O*-GlcNAc  
67 sites<sup>18, 19</sup> with limited success<sup>20</sup>. One of the limiting factors was that, unlike phosphorylation  
68 sites, *O*-GlcNAc sites lack a clear pattern in the primary structure. This is illustrated in Figure 1  
69 which compares the relative sequence entropy for sites modified by OGT and three protein  
70 kinases in the PhosphoSitePlus database<sup>14</sup>. The observed relative entropy for OGT sites shows  
71 small signal, in contrast to protein kinase A (PKA; peak in -3 and +2), protein kinase C (PKC;  
72 peak in -3) and casein kinase 2 (CK2, peak in +3) sites. This implies that the sequence in the  
73 sites recognised by OGT carries less information than those recognised by PKA, PKC or CK2  
74 and so are harder to distinguish from unmodified sites by sequence alone.

75 The crystal structure of OGT in a ternary complex with UDP-GlcNAc and a peptide substrate  
76 revealed that the OGT and the peptides' residues predominantly make contact via the peptide  
77 backbone<sup>21, 22</sup>. This fact reduces the importance of the peptide side chain in the enzyme active  
78 site, the cleft where the reaction occurs. A short structural motif, instead of sequence motif,  
79 could work as a point of molecular recognition even with a degenerate sequence. Accordingly, in  
80 this paper, the three-dimensional structures of S/T OGT substrates were examined to determine if  
81 they have distinct structural motifs and patterns of secondary structure or solvent accessibility.  
82 In addition, the predicted secondary structure and disorder were compared for known OGT  
83 substrates and S/T unlikely to be modified.

## 84 **II. Methods**

### 85 **A. Data sources**

86 The data selection process is summarised in Figure 2. A total of 1,533 modified sites from 676  
87 proteins were selected by combining proteins curated from the literature up until 2011<sup>18</sup> and from  
88 2011-2013<sup>20</sup>. The sites were filtered to keep 7-residue long motifs with unique sequences. The

89 resulting dataset contained 1,385 sites in 620 proteins. This dataset is referred to hereafter as the  
90 “modified sequence sites” (MSS). For comparison, 100,329 S/T from the same proteins, but not  
91 annotated as OGT-modified, were selected as a background and are referred to here as the  
92 “unmodified sequence sites” (USS).

93

## 94 **B. Mapping O-GlcNAc sites to protein structures**

95 Protein chains > 30 residues long from structures determined by X-ray crystallography to  $\leq$   
96 2.50 Å resolution were selected from the Protein Data Bank<sup>23</sup> (PDB: 2<sup>nd</sup> August of 2015).  
97 Mapping the 1,385 OGT sites from 620 proteins to PDB structures by SIFTS<sup>24</sup> located 45 OGT  
98 sites in 24 proteins of known structure. The structures of a further 107 sites were identified by  
99 searching the sequences of O-GlcNAcylated proteins against the PDB chains with BLAST and  
100 filtering by a conservative E-value  $\leq 10^{-25}$  to minimise erroneous matches. The cutoff of  $\leq 10^{-25}$   
101 was found empirically to ensure the reliability of the match in the region of each site by  
102 inspecting all alignments between query and PDB sequence at different thresholds. Selecting the  
103 protein chain with highest coverage (SIFTS) or E-value (BLAST) left 143 sites in 107 proteins  
104 for further analysis, referred to hereafter as the “143 Structural Sites” (SS143).

105

## 106 **C. Site definition and clustering**

107 The three-dimensional structure of OGT with its substrates suggests the region of contact  
108 between OGT and a modifiable S/T includes the residues and +/- 3 amino acids either side<sup>21, 22</sup>.  
109 From the structural sites returned in Mapping O-GlcNAc-sites to protein structures, “132  
110 Structural Sites” (hereafter SS132) had at least one match with all backbone atoms for the 7-  
111 residue long site and were retained for further analysis. C $\alpha$  atoms of each residue and the C $\alpha$  and

112 the C $\beta$  for the central S/T were superimposed for all pairs of sites. Hierarchical clustering by  
113 complete linkage was applied on the resulting matrix of root-mean-square deviation (RMSD)  
114 values and clusters selected where all pairs of peptides were within 3 Å RMSD of each other.

115

#### 116 **D. Structural properties of sites**

117 Protein secondary structure assignments were obtained from DSSP<sup>25</sup>. DSSP annotates 7 different  
118 secondary structure states:  $3_{10}$  helix (G),  $\alpha$  helix (H),  $\pi$  helix (I), bends (S), turns (T), isolated (B)  
119 and extended (E)  $\beta$ -bridge. These assignments were reduced to three states: G and H to helices  
120 (H); I, B and E to strands (E); and all other, including residues with no assignment, to coils (C)<sup>26</sup>.  
121 The solvent accessible area from DSSP was normalised by the residue's maximum accessible  
122 area<sup>27</sup>. A S/T was considered exposed if its relative solvent accessibility (RSA) was > 25%;  
123 partially buried if the RSA > 5% and  $\leq$  25%, and buried if RSA  $\leq$  5%. C $\alpha$  B-factors were  
124 standardised (Z-score normalised) over the B-factors for all C $\alpha$  in the same chain.

125

#### 126 **E. Prediction of protein disorder and secondary structure**

127 Protein secondary structure predictions for the proteins in the MSS dataset were performed by  
128 JPred4<sup>28</sup>. Since JPred4 limits sequence longer than 800 residues, 300 of the sequences in the  
129 MSS dataset sequences were trimmed while ensuring the modified S/T was at least 100 residues  
130 away from the N- and C-termini to avoid edge effects. The intrinsic disorder was predicted by  
131 JRonn (Java implementation of Ronn<sup>29</sup>), IUPred<sup>30</sup> and DisEMBL<sup>31</sup> through the JABAWS<sup>32</sup>  
132 command line application. Between them, these methods provide 6 different disorder prediction  
133 scores: DisEMBL-REM465 (0.6), DisEMBL-COILS (0.516), DisEMBL-HOTLOOPS (0.1204),  
134 IUPred-Long (0.5), IUPred-Short (0.5) and JRonn (0.5). The score ordered/disordered classes

135 were defined by the cut-offs (in parenthesis) defined by the methods' authors. Disorder  
136 predictions were also performed on a background set of 1,164 S/T selected at random from  
137 globular proteins in the Astral dataset<sup>33</sup> version 2.04, referred to hereafter as the “Globular Set”  
138 (GS).

139

## 140 **F. Statistical analysis and code**

141 The data collection, processing, analysis and the Ca clustering steps, were written in the Python  
142 programming language (Python Software Foundation, version 2.7 <http://www.python.org>) with  
143 the libraries Pandas (version 0.17)<sup>34</sup> and Biopython (version 1.65)<sup>35</sup>. Statistical tests were  
144 performed with the StatsModels (version 0.6) and Scipy (version 0.16) libraries. A *p* value (*p*)  
145 threshold was set to 0.05.

146

## 147 **III. Results and Discussion**

### 148 **A. Analysis of O-GlcNAc sites in proteins of known three-dimensional** 149 **structure**

150 Previous reports have suggested that O-GlcNAc sites, like phosphorylation sites, are  
151 predominantly present in disordered regions of proteins<sup>36</sup>. One indication of structural disorder is  
152 the crystallographic B-factor which indicates regions of the protein that lack crystallographic  
153 contacts. However, the standardised B-factor distribution on the SS143 dataset is the same for  
154 modified and unmodified S/T (Kruskal-Wallis two-sample test  $p = 0.12$ ).

155 In X-ray crystal structures, the REM465 residue annotation indicates residues that are missing  
156 from the protein structure model and has previously been used as an indicator of structural

157 disorder<sup>31</sup>. Of the 143 S/T in the SS143 dataset, 26 are in regions of the protein structure labelled  
158 as REM465. In comparison, 553 of 4,811 unmodified S/T from the same protein structures are  
159 also found in REM465 regions. Accordingly, O-GlcNAcylated S/T in these proteins are 1.7  
160 times more likely to be in REM465 regions (Fisher's exact test  $p = 0.02$ ). This finding is  
161 consistent with O-GlcNAcylated S/T occurring more frequently in disordered or highly flexible  
162 regions.

163 Table 2 summarises the DSSP assigned secondary structure for the SS143 compared to the 4,811  
164 unmodified S/T in the same proteins. The proportions of H, E and C are equivalent for the two  
165 groups implying that there is no preference in the secondary structure for modified S/T in this  
166 dataset.

167 Residues that are buried in the protein structure are not thought to be targeted by protein kinases,  
168 due to structural constraints. Figure 3 illustrates that there is no difference between modified and  
169 unmodified S/T with respect to relative solvent accessibility (RSA). 45% (65) of S/T in the O-  
170 GlcNAcylated proteins are exposed to solvent (RSA > 25%). Surprisingly, 7 O-GlcNAc sites,  
171 listed in Table 2, have an RSA < 5%, suggesting they are inaccessible to OGT in the natively  
172 folded protein.

173

## 174 **B. Groups of sites with similar local structure**

175 Since the secondary structure and relative accessibility of modified S/T were indistinguishable  
176 from unmodified S/T, the local structure of the 7 residue peptides centred on S/T was  
177 investigated by pairwise superposition and clustering (see Methods). 36 sites produce singlet  
178 clusters, while the remaining 96 sites fall into 10 clusters. Sites in clusters had less than 3 Å  
179 RMSD from each other. Figure 4 illustrates the superimposed structures for sites in clusters,



180 where green, yellow and grey represent residues in H, E, C secondary structures, respectively.  
181 The clusters show that sites are found in a wide range of secondary structure states as  
182 summarised in Appendix 1. The sites in Clusters E, G and J, have consistent consensus  
183 secondary structures. Clusters A–D, F, H and I are all variants on coil-helix or coil-strand  
184 transitions.  
185 The buried sites, which are listed in Table 3, group in clusters D and G. The 3 sites in cluster D  
186 are unlikely to be targeted by OGT because they are buried in the protein core. In contrast, the  
187 2/4 sites in cluster G (structures 3abm and 4y7y) might be modified since are located at a dimer  
188 interface, and so the monomer could be modified. The remaining two sites in cluster G  
189 (structures 2zxe and 4l3j) lie on a loop that could potentially move to expose them to OGT.  
190 To see if the clusters found for the SS132 dataset are features of *O*-GlcNAc modification or just  
191 reflect the composition of the protein structures, 132 sites, centred on unmodified S/T, were  
192 randomly sampled with replacement from the same proteins and clustered. The process was  
193 repeated 1,000 times and the resulting clusters compared to those clusters in the SS132 dataset.  
194 The number of clusters identified in each sample ranged from 10-14 (95% CI), which is  
195 consistent with the SS132 dataset. Furthermore, the structural clusters identified for the random  
196 sampling included structural clusters similar to those for the modified sites, suggesting there are  
197 no dominant secondary structural or conformational patterns indicative of *O*-GlcNAc modified  
198 sites in the SS132 dataset.  
199

## 200           **C.     Analysis of features predicted for the “Modified Sequence Sites”** 201           **dataset (MSS)**

202     Since the structural analysis of *O*-GlcNAc sites is limited by the number of sites in proteins of  
203     known three-dimensional structure, prediction algorithms were applied to the sequences in the  
204     MSS and USS datasets, as detailed in Methods. The proportions of S/T in the levels of solvent  
205     accessibility predicted by JPred are equivalent in the MSS and USS datasets, as shown in  
206     Table 4. 1% of the S/T are predicted to be buried in the MSS and USS datasets. Again, the result  
207     is unexpected, since sites modified by PTM are thought to be accessible in the protein native  
208     fold.

209     While the structural sites in the SS143 dataset have equal proportions of the secondary structure  
210     states, the result from secondary structure predictions on the MSS set showed that *O*-GlcNAc  
211     sites are likely to reside in coils, if compared to the USS dataset.

212     Table 5 shows an increase of the proportion of modified S/T in C ( $p < 0.01$ ) and a corresponding  
213     reduction in H ( $p < 0.01$ ), but no change in E ( $p = 0.6$ ). The enrichment of sites in C is consistent  
214     with the need to place modified S/T in loops that are more likely to be mobile and so more  
215     accessible to OGT. The proportions of secondary structure assigned by DSSP and predicted by  
216     JPred4 differ. While secondary structure prediction has limited accuracy, the number of samples  
217     in the SS143 dataset is limited and potentially biased toward structured regions in proteins. Also,  
218     clustering sites in the SS132 dataset highlight groups that are more likely to occur near to the  
219     transition between a secondary structure element and C, as observed in several members of  
220     clusters A–D, F and H. The regions of transition between C and H/E are harder to predict than  
221     contiguous secondary structure elements, and this may also contribute to the observed  
222     enrichment in C.

223 The analysis of SS143 dataset showed an enrichment of S/T in REM465 regions likely to be  
224 disordered or highly mobile. To explore this further, 3 disorder prediction algorithms, giving a  
225 total of 6 disorder scores, were run on the MSS and USS datasets as detailed in Methods. Table 6  
226 shows that, with the exception of DisEMBL-HOTLOOPS which is trained structural B-factors,  
227 all methods report a small but significant increase in mean predicted disorder for the modified  
228 S/T. To confirm this result, the MSS dataset was compared to the GS dataset, which was selected  
229 from proteins known to be predominantly globular, and hence an ordered background. In Figure  
230 5, DisEMBL-HOTLOOPS shows an increase in the ratio of disordered residues around the  
231 modified S/T. DisEMBL-COILS and JRonn also indicate a small increase, not in a specific  
232 region, but rather for 40 residues around the S/T. IUPred-Long, IUPred-Short and DisEMBL-  
233 REM465 show a bigger increase of the ratio of disordered residues in the MSS dataset and  
234 IUPred-Short and REM465 have a clearer peak within -15 to 15 residues from the modified S/T.  
235 Overall, all methods indicate an increased proportion of predicted disorder in the MSS dataset  
236 when compared to the GS dataset.

#### 237 **IV. Conclusions and final remarks**

238 Despite the substantial evidence of protein structural disorder in the MSS and the SS143  
239 datasets, the SS132 dataset clearly indicates that some of the examined sites appear within  
240 ordered regions of the protein structure. Furthermore, InterproScan<sup>37</sup> analysis of *O*-GlcNAc sites  
241 assigned 19 % of the sites to protein domains, this is similar to with the 25 % phosphoserines and  
242 phosphothreonines in PFAM domains<sup>14, 38</sup>, which are thought to be mostly ordered by definition.  
243 So, like protein phosphorylation, *O*-GlcNAcylated S/T are found in both ordered and disordered  
244 regions.

245 The local tertiary structure of *O*-GlcNAc sites is indistinguishable from unmodified sites. So,  
246 how does OGT recognise the site it modifies? OGT may force the unfolding of the targeted  
247 substrate<sup>39</sup>. Moreover, OGT participates in macromolecular assemblies<sup>40</sup>, and so adaptor proteins  
248 should be important. Non-local interactions might also act in OGT substrate recognition. In  
249 protein kinase C (PKC) substrate recognition, residues distant in the protein sequence but close  
250 in its three-dimensional structure are critical<sup>41</sup>. Other components, such as UDP-GlcNAc  
251 concentration and subcellular location-dependent interactions, modulate OGT activity<sup>42</sup>, but their  
252 part in substrate recognition is still unknown. In conclusion, although no three-dimensional  
253 fingerprint was detected during the structural characterisation of OGT-modified sites, the work  
254 confirmed that S/T and surrounding residues are more disordered than the backgrounds tested  
255 and that sites in transition between C to H/E might be involved, suggesting that the structural  
256 flexibility has a role on OGT site recognition.

### 257 **Acknowledgements**

258 We would like to thank Dr. Tom Walsh and the University of Dundee IT department for  
259 computing support; Prof. Daan van Aalten and DVA group for advice and discussions.

### 260 **Funding**

261 This work was supported by Coordenação de Aperfeiçoamento de Pessoal de Nível Superior  
262 (CAPES process 1529/12-9; studentship to T.B.B).

### 263 **Conflict of Interest:**

264 None declared.

265

266

## 267 **References**

- 268 1. Shafi R, Iyer SP, Ellies LG, O'Donnell N, Marek KW, Chui D, Hart GW, Marth JD. The  
269 O-GlcNAc transferase gene resides on the X chromosome and is essential for embryonic  
270 stem cell viability and mouse ontogeny. *Proc Natl Acad Sci U S A* 2000;97(11):5735–  
271 5739.
- 272 2. O'Donnell N, Zachara NE, Hart GW, Marth JD. Ogt-Dependent X-Chromosome-Linked  
273 Protein Glycosylation Is a Requisite Modification in Somatic Cell Function and Embryo  
274 Viability. *Mol Cell Biol* 2004;24(4):1680–1690.
- 275 3. Buse MG. Hexosamines, insulin resistance, and the complications of diabetes: current  
276 status. *Am J Physiol Endocrinol Metab* 2006;290(1):E1–E8.
- 277 4. Abdel Rahman AM, Ryczko M, Pawling J, Dennis JW. Probing the hexosamine  
278 biosynthetic pathway in human tumor cells by multitargeted tandem mass spectrometry.  
279 *ACS Chem Biol* 2013;8(9):2053–2062.
- 280 5. Liu J, Marchase RB, Chatham JC. Increased O-GlcNAc levels during reperfusion lead to  
281 improved functional recovery and reduced calpain proteolysis. *Am J Physiol Heart Circ*  
282 *Physiol* 2007;293(3):H1391-9.
- 283 6. McClain DA, Lubas WA, Cooksey RC, Hazel M, Parker GJ, Love DC, Hanover JA.  
284 Altered glycan-dependent signaling induces insulin resistance and hyperleptinemia. *Proc*  
285 *Natl Acad Sci U S A* 2002;99(16):10695–10699.
- 286 7. Mariappa D, Zheng X, Schimpl M, Raimi O, Ferenbach AT, Müller H-AJ, Aalten DMF  
287 van. Dual functionality of O -GlcNAc transferase is required for *Drosophila* development.  
288 *Open Biol* 2015;5(12):150234.
- 289 8. Lynch TP, Ferrer CM, Jackson SR, Shahriari KS, Vosseller K, Reginato MJ. Critical Role  
290 of O-Linked -N-Acetylglucosamine Transferase in Prostate Cancer Invasion,  
291 Angiogenesis, and Metastasis. *J Biol Chem* 2012;287(14):11070–11081.
- 292 9. Liu F, Iqbal K, Grundke-Iqbal I, Hart GW, Gong C-X. O-GlcNAcylation regulates  
293 phosphorylation of tau: A mechanism involved in Alzheimer's disease. *Proc Natl Acad*  
294 *Sci* 2004;101(29):10804–10809.
- 295 10. Chen D, Juárez S, Hartweck L, Alamillo JM, Simón-Mateo C, Pérez JJ, Fernández-  
296 Fernández MR, Olszewski NE, García JA. Identification of secret agent as the O-GlcNAc  
297 transferase that participates in Plum pox virus infection. *J Virol* 2005;79(15):9381–9387.
- 298 11. Kuo M, Zilberfarb V, Gangneux N, Christeff N, Issad T. O-glycosylation of FoxO1  
299 increases its transcriptional activity towards the glucose 6-phosphatase gene. *FEBS Lett*  
300 2008;582(5):829–834.
- 301 12. Wells L. Mapping Sites of O-GlcNAc Modification Using Affinity Tags for Serine and  
302 Threonine Post-translational Modifications. *Mol Cell Proteomics* 2002;1(10):791–804.
- 303 13. Parker GJ, Lund KC, Taylor RP, McClain DA. Insulin resistance of glycogen synthase  
304 mediated by o-linked N-acetylglucosamine. *J Biol Chem* 2003;278(12):10022–10027.
- 305 14. Hornbeck P V, Zhang B, Murray B, Kornhauser JM, Latham V, Skrzypek E.  
306 PhosphoSitePlus, 2014: mutations, PTMs and recalibrations. *Nucleic Acids Res*  
307 2015;43(Database issue):D512-20.
- 308 15. Roquemore EP, Dell A, Morris HR, Panico M, Reason AJ, Savoy LA, Wistow GJ, Zigler  
309 JS, Earles BJ, Hart GW. Vertebrate lens alpha-crystallins are modified by O-linked N-  
310 acetylglucosamine. *J Biol Chem* 1992;267(1):555–563.
- 311 16. Hahne H, Gholami AM, Kuster B, Moghaddas Gholami A, Kuster B. Discovery of O-

- 312 GlcNAc-modified proteins in published large-scale proteome data. *Mol Cell Proteomics*  
313 2012;11(10):843–850.
- 314 17. Ma J, Hart GW. O-GlcNAc profiling: from proteins to proteomes. *Clin Proteomics*  
315 2014;11(1):8.
- 316 18. Wang J, Torii M, Liu H, Hart GW, Hu Z. dbOGAP - An Integrated Bioinformatics  
317 Resource for Protein O-GlcNAcylation. *BMC Bioinformatics* 2011;12(1):91.
- 318 19. Jia C-Z, Liu T, Wang Z-P. O-GlcNAcPRED: a sensitive predictor to capture protein O-  
319 GlcNAcylation sites. *Mol Biosyst* 2013;9(11):2909–2913.
- 320 20. Jochmann R, Holz P, Sticht H, Stürzl M. Validation of the reliability of computational O-  
321 GlcNAc prediction. *Biochim Biophys Acta - Proteins Proteomics* 2014;1844(2):416–421.
- 322 21. Lazarus MB, Nam Y, Jiang J, Sliz P, Walker S. Structure of human O-GlcNAc transferase  
323 and its complex with a peptide substrate. In: *Nature*. Volume 469. Nature Publishing  
324 Group; 2011. p 564–567.
- 325 22. Schimpl M, Zheng X, Borodkin VS, Blair DE, Ferenbach AT, Schüttelkopf AW,  
326 Navratilova I, Aristotelous T, Albarbarawi O, Robinson D a, Macnaughtan M a, Aalten  
327 DMF van. O-GlcNAc transferase invokes nucleotide sugar pyrophosphate participation in  
328 catalysis. *Nat Chem Biol* 2012;8(12):969–974.
- 329 23. Velankar S, Alhroub Y, Alili A, Best C, Boutselakis HC, Caboche S, Conroy MJ, Dana  
330 JM, Ginkel G van, Golovin A, Gore SP, Gutmanas A, Haslam P, Hirshberg M, John M,  
331 Lagerstedt I, Mir S, Newman LE, Oldfield TJ, Penkett CJ, Pineda-Castillo J, Rinaldi L,  
332 Sahni G, Sawka G, Sen S, Slowley R, Sousa da Silva AW, Suarez-Uruena A,  
333 Swaminathan GJ, Symmons MF, Vranken WF, Wainwright M, Kleywegt GJ. PDBe:  
334 Protein Data Bank in Europe. *Nucleic Acids Res* 2011;39(Database issue):D402-10.
- 335 24. Velankar S, Dana JM, Jacobsen J, Ginkel G van, Gane PJ, Luo J, Oldfield TJ, O'Donovan  
336 C, Martin M-J, Kleywegt GJ. SIFTS: Structure Integration with Function, Taxonomy and  
337 Sequences resource. *Nucleic Acids Res* 2013;41(Database issue):D483-9.
- 338 25. Kabsch W, Sander C. Dictionary of protein secondary structure: pattern recognition of  
339 hydrogen-bonded and geometrical features. *Biopolymers* 1983;22(12):2577–2637.
- 340 26. Cuff J a, Barton GJ. Evaluation and improvement of multiple sequence methods for  
341 protein secondary structure prediction. In: *Proteins*. Volume 34. 1999. p 508–519.
- 342 27. Cuff JA, Barton GJ. Application of multiple sequence alignment profiles to improve  
343 protein secondary structure prediction. In: *Proteins*. Volume 40. John Wiley & Sons, Inc.;  
344 2000. p 502–511.
- 345 28. Drozdetskiy A, Cole C, Procter J, Barton GJ. JPred4: A protein secondary structure  
346 prediction server. *Nucleic Acids Res* 2015;43(W1):W389-94.
- 347 29. Yang ZR, Thomson R, McNeil P, Esnouf RM. RONN: the bio-basis function neural  
348 network technique applied to the detection of natively disordered regions in proteins.  
349 *Bioinformatics* 2005;21(16):3369–3376.
- 350 30. Dosztányi Z, Csizmók V, Tompa P, Simon I. The pairwise energy content estimated from  
351 amino acid composition discriminates between folded and intrinsically unstructured  
352 proteins. *J Mol Biol* 2005;347(4):827–839.
- 353 31. Linding R, Jensen LJ, Diella F, Bork P, Gibson TJ, Russell RB. Protein Disorder  
354 Prediction. *Structure* 2003;11(11):1453–1459.
- 355 32. Troshin P V, Procter JB, Barton GJ. Java bioinformatics analysis web services for  
356 multiple sequence alignment--JABAWS:MSA. *Bioinformatics* 2011;27(14):2001–2002.
- 357 33. Fox NK, Brenner SE, Chandonia J-M. SCOPe: Structural Classification of Proteins--

- 358 extended, integrating SCOP and ASTRAL data and classification of new structures.  
359 Nucleic Acids Res 2014;42(Database issue):D304-9.
- 360 34. McKinney W, Team PD. Pandas - Powerful Python Data Analysis Toolkit. In: Pandas -  
361 Powerful Python Data Analysis Toolkit. 2015. p 1625.
- 362 35. Cock PJA, Antao T, Chang JT, Chapman BA, Cox CJ, Dalke A, Friedberg I, Hamelryck  
363 T, Kauff F, Wilczynski B, Hoon MJL de. Biopython: freely available Python tools for  
364 computational molecular biology and bioinformatics. In: Bioinformatics. Volume 25.  
365 2009. p 1422–1423.
- 366 36. Trinidad JC, Barkan DT, Gulledge BF, Thalhammer a., Sali a., Schoepfer R, Burlingame  
367 a. L. Global Identification and Characterization of Both O-GlcNAcylation and  
368 Phosphorylation at the Murine Synapse. Mol Cell Proteomics 2012;11(8):215–229.
- 369 37. Zdobnov EM, Apweiler R. InterProScan - an integration platform for the signature-  
370 recognition methods in InterPro. Bioinformatics 2001;17(9):847–848.
- 371 38. Beltrao P, Albanèse V, Kenner LR, Swaney DL, Burlingame A, Villén J, Lim WA, Fraser  
372 JS, Frydman J, Krogan NJ. Systematic Functional Prioritization of Protein  
373 Posttranslational Modifications. Cell 2012;150(2):413–425.
- 374 39. Pathak S, Alonso J, Schimpl M, Rafie K, Blair DE, Borodkin VS, Schüttelkopf AW,  
375 Albarbarawi O, Aalten DMF van. The active site of O-GlcNAc transferase imposes  
376 constraints on substrate sequence. Nat Struct Mol Biol 2015;22(9):744–750.
- 377 40. Wells L, Kreppel LK, Comer FI, Wadzinski BE, Hart GW. O-GlcNAc Transferase Is in a  
378 Functional Complex with Protein Phosphatase 1 Catalytic Subunits. J Biol Chem  
379 2004;279(37):38466–38470.
- 380 41. Duarte ML, Pena DA, Nunes Ferraz FA, Berti DA, Paschoal Sobreira TJ, Costa-Junior  
381 HM, Abdel Baqui MM, Disatnik MM-H, Xavier-neto J, Lopes de Oliveira PS,  
382 Schechtman D, Augusto F, Ferraz N, Berti DA, José T, Sobreira P, Costa-Junior HM,  
383 Muhammad M, Baqui A, Disatnik MM-H, Xavier-neto J. Protein folding creates  
384 structure-based, noncontiguous consensus phosphorylation motifs recognized by kinases.  
385 Sci Signal 2014;7(350):ra105-ra105.
- 386 42. Nagel AK, Ball LE. O-GlcNAc transferase and O-GlcNAcase: achieving target substrate  
387 specificity. Amino Acids 2014;46(10):2305–2316.
- 388 43. Crooks GE, Hon G, Chandonia J-M, Brenner SE. WebLogo: a sequence logo generator.  
389 Genome Res 2004;14(6):1188–1190.
- 390  
391

## 392 Tables

393 Table 1 Dataset summary. See Methods for details.

394

| Dataset name                   | Number of sites | Number of proteins | Short name |
|--------------------------------|-----------------|--------------------|------------|
| Modified Sequence Sites        | 1,385           | 620                | MSS        |
| Unmodified Sequence Sites      | 100,329         | 620                | USS        |
| Structural Sites               | 143             | 106                | SS143      |
| Structural Sites with backbone | 132             | 93                 | SS132      |
| Globular Set                   | 1,164           | 1,164              | GS         |

395

396 Table 2 DSSP assigned secondary structure proportion of S/T in the SS143 dataset compared to  
 397 unmodified S/T in same protein chains. 95% CI – 95% confidence interval; n – number of S/T.  
 398 The *p* value refers to the two-tailed z-score test between the proportions of modified and  
 399 unmodified groups.

400

| Secondary structure | Modified       |                       | Unmodified     |                       | <i>p</i> value |
|---------------------|----------------|-----------------------|----------------|-----------------------|----------------|
|                     | Proportion (n) | 95% CI [lower, upper] | Proportion (n) | 95% CI [lower, upper] |                |
| C                   | 0.55 (78)      | [0.46, 0.63]          | 0.51 (2475)    | [0.50, 0.53]          | 0.36           |
| H                   | 0.25 (36)      | [0.18, 0.32]          | 0.32 (1525)    | [0.31, 0.33]          | 0.06           |
| E                   | 0.20 (29)      | [0.13, 0.27]          | 0.17 (811)     | [0.16, 0.18]          | 0.27           |
| Total               | 143            |                       | 4,811          |                       |                |

401

402

403 Table 3 Structural evidence of buried *O*-GlcNAc sites in the SS143 dataset. RSA – site mean  
 404 relative solvent accessibility; Cluster id – Clusters in Figure 4.

405

| PDB id | Chain | Position | Cluster id | RSA  |
|--------|-------|----------|------------|------|
| 1f4j   | B     | 114      | D          | 0.05 |
| 3cb2   | B     | 170      | D          | 0.02 |
| 4qvp   | T     | 131      | D          | 0.01 |
| 2zxe   | A     | 366      | G          | 0.02 |
| 3abm   | R     | 63       | G          | 0.01 |
| 4l3j   | A     | 180      | G          | 0.01 |
| 4y7y   | Z     | 190      | G          | 0.04 |



406  
 407 Table 4 JPred4 predicted solvent accessibility for S/T in the MSS and USS datasets. The  
 408 proportions of buried S/T as predicted by the Jnetsol method in JPred4. The proportions of  
 409 buried S/T are significantly smaller for modified group. 95% CI – 95% confidence interval; n –  
 410 number of S/T predicted to be buried. The *p* value refers to the two-tailed z-score test between  
 411 the modified and unmodified groups.  
 412

| Buried at | Modified (MSS) |                       | Unmodified (USS) |                       | <i>p</i> value |
|-----------|----------------|-----------------------|------------------|-----------------------|----------------|
|           | Proportion (n) | 95% CI [lower, upper] | Proportion (n)   | 95% CI [lower, upper] |                |
| 0%        | 0.01 (7)       | [0.00, 0.01]          | 0.01 (836)       | [0.008, 0.009]        | 0.18           |
| 5%        | 0.04 (55)      | [0.03, 0.05]          | 0.04 (3,917)     | [0.038, 0.040]        | 0.86           |
| 25%       | 0.29 (403)     | [0.27, 0.31]          | 0.35 (28,044)    | [0.27, 0.28]          | 0.31           |

413  
 414  
 415 Table 5 JPred4 predicted secondary structure proportions for S/T in the MSS and USS datasets.  
 416 95% CI – 95% confidence interval; n – the number of S/T; the *p* value refers to the two-tailed z-  
 417 score test between the modified and unmodified groups.  
 418

| Secondary structure | Modified (MSS) |                       | Unmodified (USS) |                       | <i>p</i> value |
|---------------------|----------------|-----------------------|------------------|-----------------------|----------------|
|                     | Proportion (n) | 95% CI [lower, upper] | Proportion (n)   | 95% CI [lower, upper] |                |
| C                   | 0.88 (1,205)   | [0.86, 0.90]          | 0.829 (83,150)   | [0.826, 0.831]        | <0.01          |
| H                   | 0.08 (106)     | [0.07, 0.09]          | 0.126 (12,684)   | [0.124, 0.128]        | <0.01          |
| E                   | 0.05 (66)      | [0.04, 0.06]          | 0.045 (4,495)    | [0.044, 0.046]        | 0.6            |

419  
 420  
 421  
 422 Table 6 Predicted disorder between modified and unmodified S/T. All disorder prediction  
 423 methods, excepting DisEMBL-HOTLOOPS, reveal a small but significant increase of mean  
 424 disorder score for modified S/T over unmodified ones. The *p* value refers to the two-tailed t-test  
 425 between the modified and unmodified groups. SE – standard error.  
 426

| Method         | Mean score modified (MSS) ± SE | Mean score unmodified (USS) ± SE | <i>p</i> value |
|----------------|--------------------------------|----------------------------------|----------------|
| DisEMBL-REM465 | 0.48 ± 0.004                   | 0.47 ± 0.001                     | 0.01           |
| DisEMBL-COILS  | 0.60 ± 0.004                   | 0.58 ± 0.001                     | <0.01          |

|                      |                  |                  |       |
|----------------------|------------------|------------------|-------|
| DisEMBL-<br>HOTLOOPS | $0.10 \pm 0.001$ | $0.10 \pm 0.001$ | 0.45  |
| IUpred-Long          | $0.59 \pm 0.006$ | $0.55 \pm 0.001$ | <0.01 |
| IUpred-Short         | $0.48 \pm 0.005$ | $0.45 \pm 0.001$ | <0.01 |
| JRonn                | $0.62 \pm 0.004$ | $0.61 \pm 0.001$ | 0.02  |

427

428

429

## 430 **Legend to figures**

431 **Figure 1:** Sequence relative entropy of sites (+/- 7 residues) from 4 post-translational  
432 modifications. Three kinases with most sites in PhosphoSitePlus database<sup>14</sup>: protein kinase A  
433 (PKA with 1285 sites), protein kinase C (PKC with 930 sites) and casein kinase 2 (CK2 with 742  
434 sites). 1530 OGT sites were compiled from the same database. The sequence relative entropy  
435 was calculated with the WebLogo library<sup>43</sup>. Lines show mean relative entropy and the semi-  
436 transparent area represents 95% confidence intervals. Unlikely the PKA, PKC and CK2, known  
437 OGT sites have no clear sequence consensus.

438 **Figure 2:** Diagram of the relationships among the 5 datasets used in this work. See Methods for  
439 details.

440 **Figure 3:** RSA of modified S/T in the SS143 dataset and unmodified S/T in same proteins.  
441 DSSP calculated solvent accessibility was normalised by the residue theoretical maximum  
442 accessibility, and the derived scores were reduced to three levels: buried ( $RSA \leq 0.05$ ), partially  
443 buried ( $0.05 < RSA \leq 0.25$ ) and exposed ( $RSA > 0.25$ ). The y-axis and x-axis carry the RSA  
444 levels and the RSA distribution for each level, respectively. The mean RSA is equivalent  
445 between modified and unmodified residues, at all three levels.

446 **Figure 4:** Structural superimpositions for the 10 clusters comprising 96 sites in the SS132  
447 dataset. Pairs of sites were superimposed on their 7 C $\alpha$  atoms and the C $\beta$  of the central S/T.  
448 Their pairwise RMSD were clustered with complete linkage and Euclidean distance. Clusters  
449 were defined by a 3 Å RMSD threshold. Green, yellow and grey represent residues in H, E, C  
450 secondary structures elements, respectively.

451 **Figure 5:** Predicted disorder around O-GlcNAc sites in the MSS compared randomly selected  
452 S/T in the GS-dataset. The y-axis shows the log<sub>10</sub> odds ratio of the between the proportion of

453 disordered residues in the MSS dataset and the proportion of disordered residues in the GS  
454 dataset. The semi-transparent area represents 95% confidence intervals. A residue was defined as  
455 disordered given a method threshold. The x-axis represents the distance in residues of the central  
456 residue, always a S/T. DisEMBL-REM465, IUpred-short predict protein structural disorder  
457 specifically around the modification site, while the other methods detect intrinsic disorder over  
458 O-GlcNAcylated proteins. DisEMBL-HOTLOOPS shows a less pronounced increase compared  
459 to the other methods.  
460

## 461 **Figures**

462 Figure 1

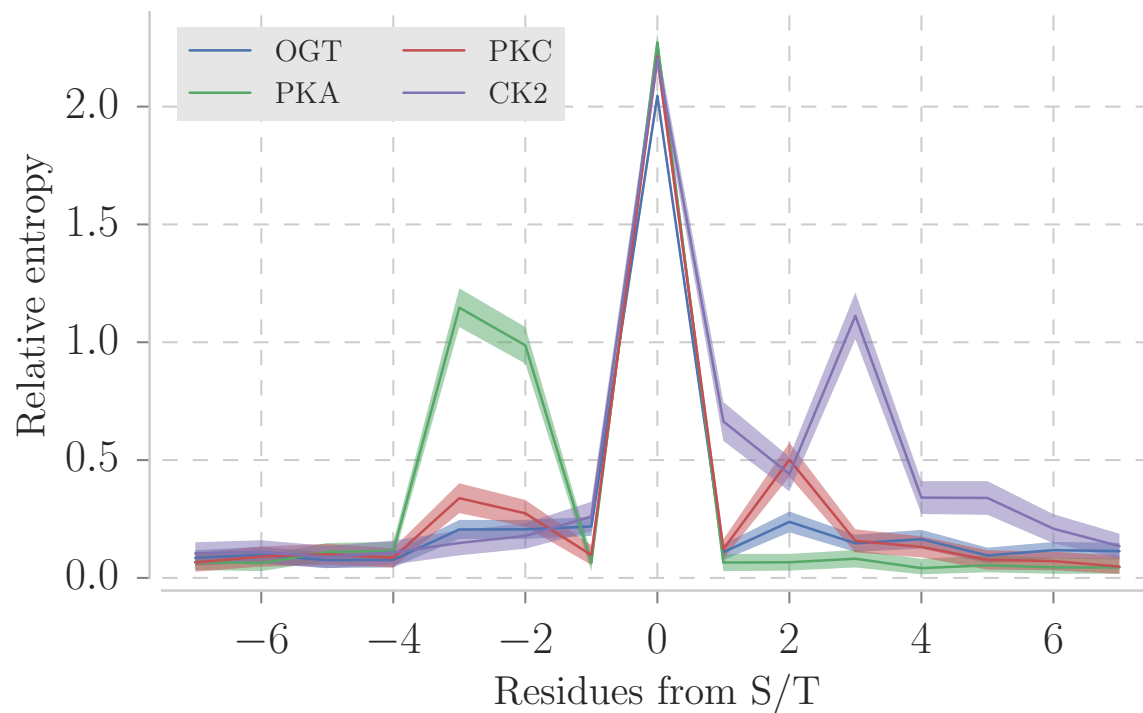

463

464

465

466

467

468

469

470

471

472

473

474

475 Figure 2

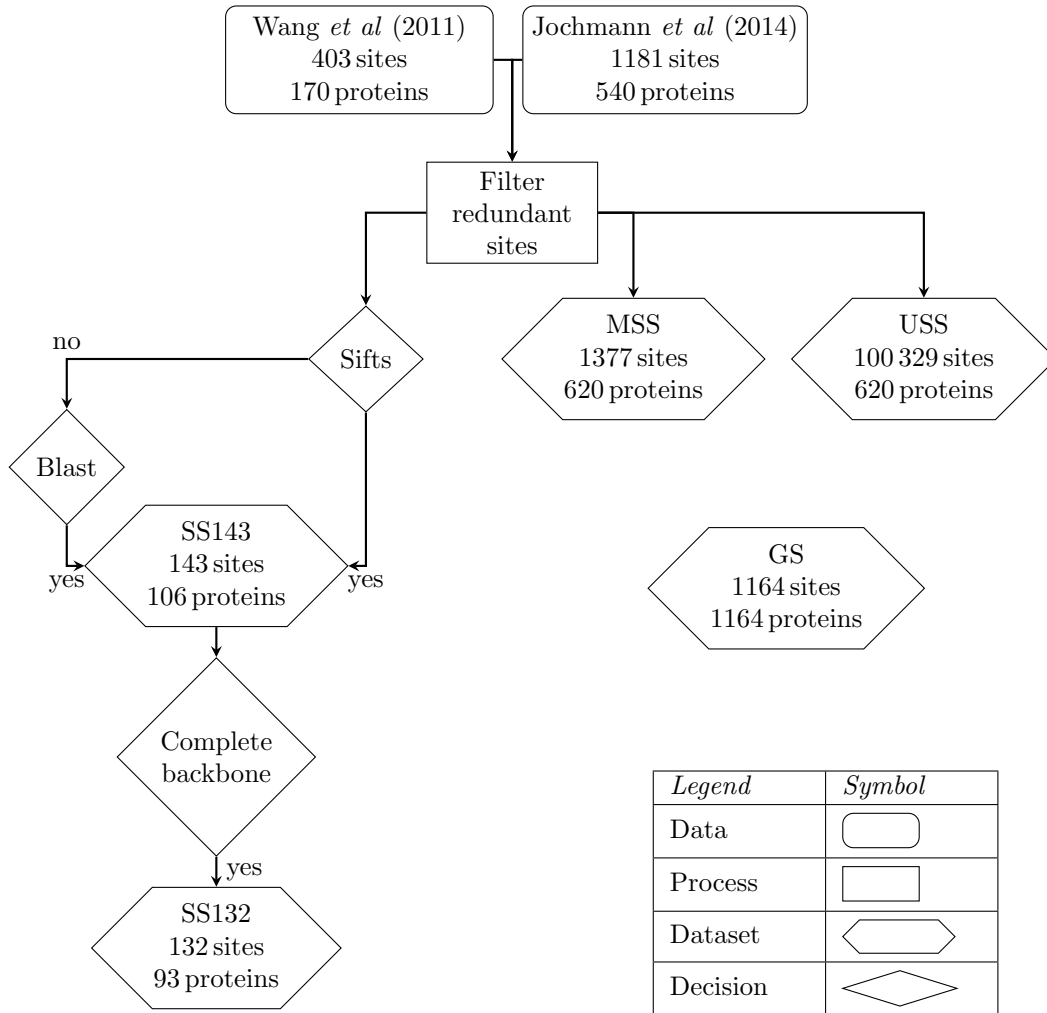

| <i>Legend</i> | <i>Symbol</i> |
|---------------|---------------|
| Data          |               |
| Process       |               |
| Dataset       |               |
| Decision      |               |

476

477

478 Figure 3

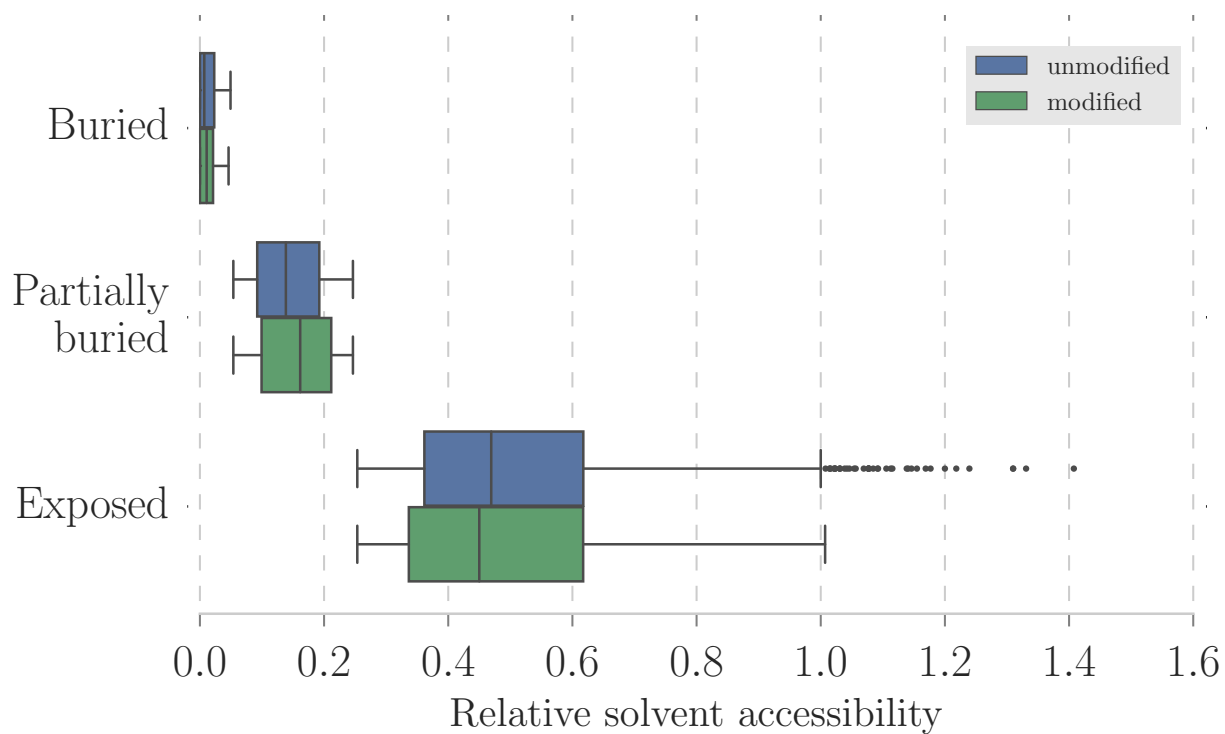

479

480

481 Figure 4

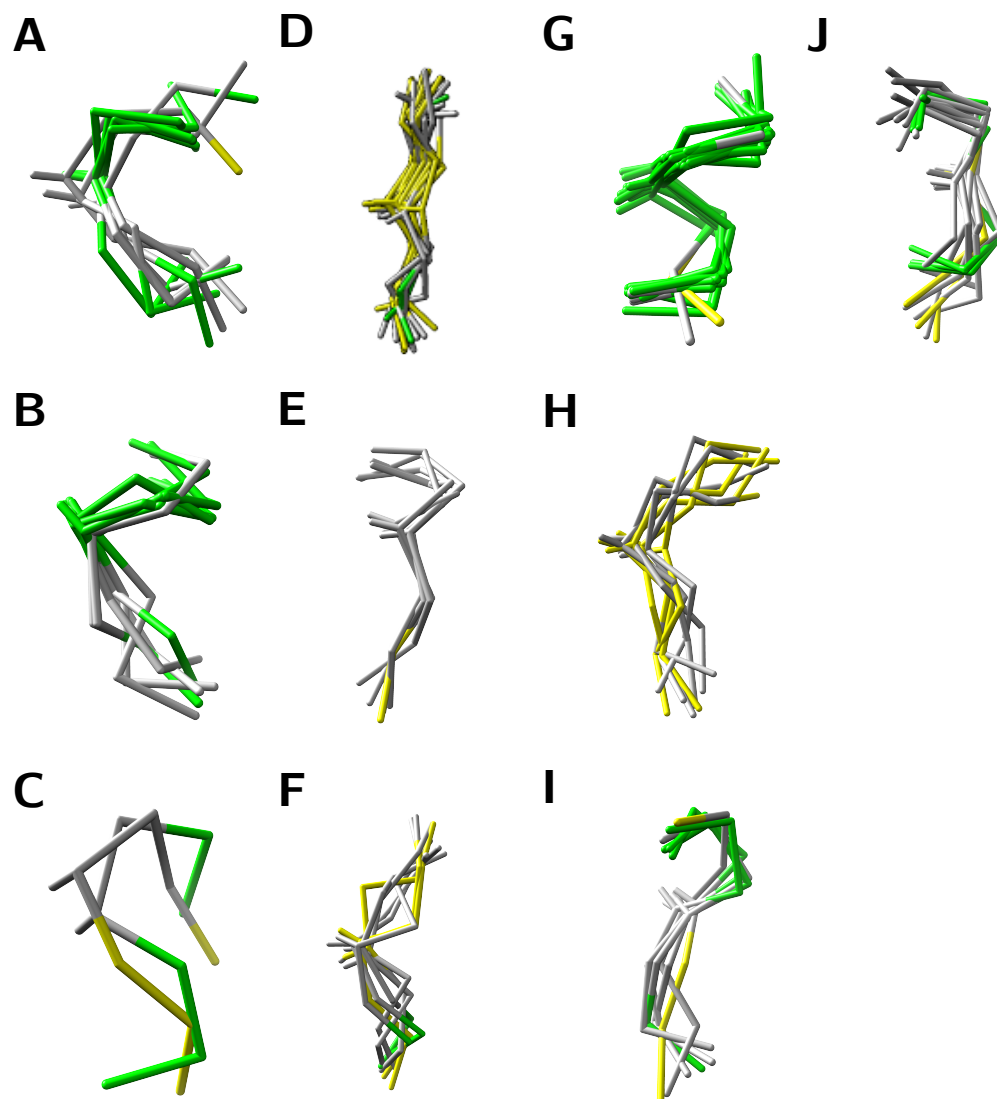

482



483 Figure 5

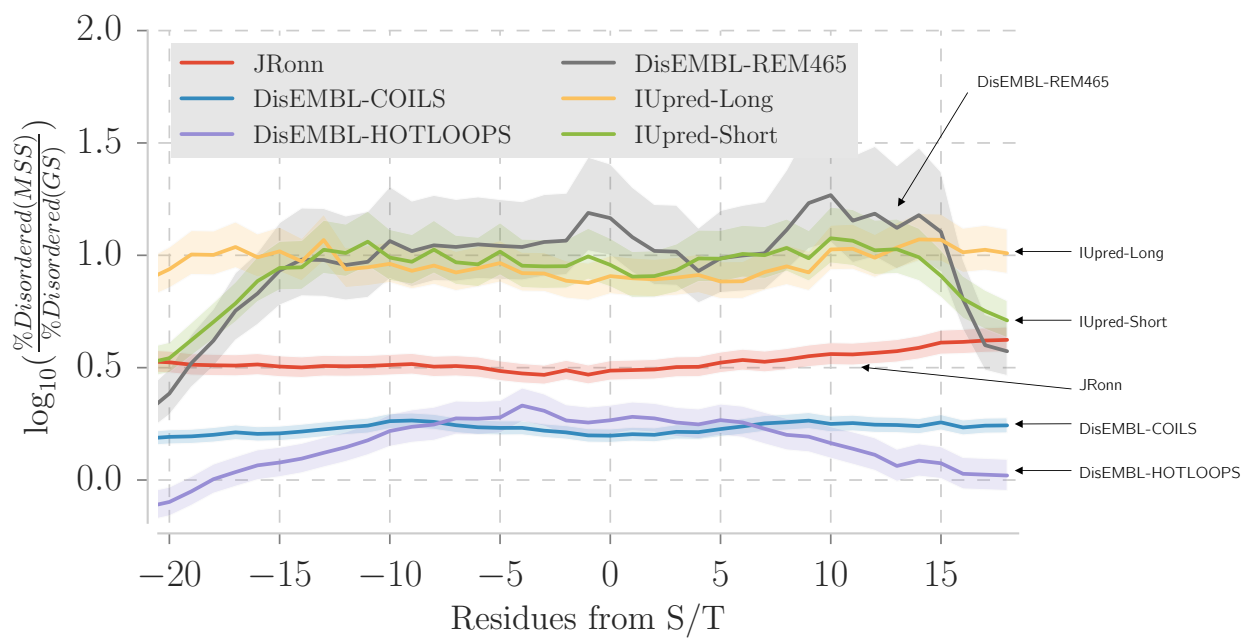

484
